## RESEARCH LETTER

# An MTA phosphorylase gene discovered in the metagenomic library derived from Antarctic top soil during screening for lipolytic active clones confers strong pink fluorescence in the presence of rhodamine B

Hubert Cieśliński<sup>1</sup>, Anna Długołęcka<sup>1</sup>, Józef Kur<sup>1</sup> & Marianna Turkiewicz<sup>2</sup>
<sup>1</sup>Department of Microbiology, Chemical Faculty, Gdańsk University of Technology, Gdańsk, Poland; and <sup>2</sup>Institute of Technical Biochemistry, Technical University of Łódź, Łódź, Poland

**Correspondence:** Hubert Cieśliński, Department of Microbiology, Chemical Faculty, Gdańsk University of Technology, Narutowicza 11/12, 80-952 Gdańsk, Poland. Tel.: +48 58 347 16 05; fax: +48 58 347 18 22; e-mail: hcieslin@pg.gda.pl

Received 19 May 2009; accepted 31 July 2009.  
Final version published online 1 September 2009.

DOI:10.1111/j.1574-6968.2009.01756.x

Editor: David Studholme

## Keywords

rhodamine B; methylthioadenosine phosphorylase; metagenomic library; psychrophilic bacteria; lipase.

## Abstract

In this work, we present the construction of a metagenomic library in *Escherichia coli* using the pUC19 vector and environmental DNA directly isolated from Antarctic topsoil and screened for lipolytic enzymes. Unexpectedly, the screening on agar supplemented with olive oil and rhodamine B revealed one unusual pink fluorescent clone (PINKuv) out of 85 000 clones. This clone harbored a plasmid, pPINKuv, which has an insert of 8317 bp that has been completely sequenced. Further analysis of the insert showed eight ORFs. Three ORFs among these exhibited similarities to *Psychrobacter arcticus* genes. A nucleotide sequence designated as ORF4 encoded a protein with 93% identity to the methylthioadenosine phosphorylase of *P. arcticus*. This protein was responsible for the observed pink fluorescence of the PINKuv clone in the presence of rhodamine B. We found that colonies of recombinant *E. coli* TOP10F'/pUC19-ORF4 strain showed pink fluorescence under UV illumination on the Luria–Bertani agar supplemented with rhodamine B after culturing at 25, 30 and 37 °C. The same effect was achieved using other *E. coli* strains such as DH5α, LMG194, JM101 and BL21(DE3) pLysS. The results presented here will provide the basis for further studies on the use of the discovered gene as a new reporter gene for molecular biology applications.

## Introduction

The power of metagenomics is the access, without prior nucleotide sequence information, to the unculturable majority, which is estimated to be > 99% of the prokaryotic organisms (Amann *et al.*, 1995; Rappe & Giovannoni, 2003; Schloss & Handelsman, 2003; Daniel, 2004; Streit *et al.*, 2004). Many studies related to an activity-based strategy have demonstrated that the metagenomic approach allows for finding various biocatalysts such as lipases, esterases, amylases, cellulases, xylanases, proteases and nitrilases (DeSantis *et al.*, 2002; Gupta *et al.*, 2002; Yun *et al.*, 2004; Kim *et al.*, 2006, 2008; Hardeman & Sjoling, 2007; Park *et al.*, 2007; Hu *et al.*, 2008; Jeon *et al.*, 2008; Wei *et al.*, 2008) and novel antibiotics, such as turbomycin A and B (Gillespie *et al.*, 2002).

In this study, we constructed an Antarctic soil metagenomic library and screened for lipolytic active clones. Several clones with lipolytic activity were detected. One of the clones obtained lacked lipolytic activity, but it surprisingly showed a pink fluorescent phenotype in the presence of rhodamine B. We identified the gene responsible for this phenotype.

## Materials and methods

### Bacterial strains and plasmids

The strains and plasmids used in this study are listed in Table 1.

**Table 1.** Bacteria strains and plasmids used in this study

| Bacteria or plasmids            | Relevant characteristics                                                                                                                                                                                                                                                                          | Source     |
|---------------------------------|---------------------------------------------------------------------------------------------------------------------------------------------------------------------------------------------------------------------------------------------------------------------------------------------------|------------|
| <b>Bacteria</b>                 |                                                                                                                                                                                                                                                                                                   |            |
| <i>E. coli</i> TOP10F'          | F' <i>{lacIq Tn10(Tet<sup>R</sup>)}</i> <i>mcrA</i> $\Delta$ ( <i>mrr-hsdRMS-mcrBC</i> ) $\phi$ 80 <i>lacZ</i> $\Delta$ M15 $\Delta$ <i>lacX74</i> <i>recA1</i> <i>araD139</i> $\Delta$ ( <i>ara-leu</i> )7697 <i>galU</i> <i>galK</i> <i>rpsL</i> (Str <sup>R</sup> ) <i>endA1</i> <i>nupG</i> , | Invitrogen |
| <i>E. coli</i> DH5 $\alpha$     | F <sup>−</sup> $\phi$ 80 <i>dlacZ</i> $\Delta$ M15 $\Delta$ ( <i>lacZYA-argF</i> ) U169 <i>recA1</i> <i>endA1</i> <i>hsdR17</i> (r <sub>k</sub> <sup>−</sup> , m <sub>k</sub> <sup>+</sup> ) <i>phoA</i> <i>supE44</i> $\lambda$ <sup>−</sup> <i>thi-1</i> <i>gyrA96</i> <i>relA1</i>             | Invitrogen |
| <i>E. coli</i> LMG194           | F <sup>−</sup> $\Delta$ <i>lacX74</i> <i>galE</i> <i>galK</i> <i>thi</i> <i>rpsL</i> $\Delta$ <i>phoA</i> (PvuII) $\Delta$ <i>ara714</i> <i>leu::Tn10</i>                                                                                                                                         | Invitrogen |
| <i>E. coli</i> JM101            | F' <i>traD36</i> <i>proA</i> <sup>+</sup> <i>B</i> <sup>+</sup> <i>lacI</i> <sup>q</sup> $\Delta$ ( <i>lacZ</i> )M15/ $\Delta$ ( <i>lac-proAB</i> ) <i>glnV</i> <i>thi</i> , general cloning strain                                                                                               | NEBioLabs  |
| <i>E. coli</i> BL21 (DE3) pLysS | F <sup>−</sup> <i>ompT</i> <i>hsdSB</i> (r <sub>B</sub> <sup>−</sup> m <sub>B</sub> <sup>−</sup> ) <i>gal</i> <i>dcm</i> $\lambda$ (DE3)pLysS T1R                                                                                                                                                 | Novagen    |
| <b>Plasmids</b>                 |                                                                                                                                                                                                                                                                                                   |            |
| pUC19                           | Cloning vector, Amp <sup>R</sup> , ColE1 <i>ori</i> , <i>lacZ</i>                                                                                                                                                                                                                                 | Fermentas  |
| pPINKuv                         | pUC19 containing 8311-bp <i>Sau3AI</i> fragment of metagenomic DNA, Amp <sup>R</sup>                                                                                                                                                                                                              | This work  |
| pPINKuvKpnI                     | pPINKuv with deleted 3593-bp <i>KpnI</i> fragment, Amp <sup>R</sup>                                                                                                                                                                                                                               | This work  |
| pPINKuvKpnISacI                 | pPINKuvKpnI with deleted 3027-bp <i>SacI</i> fragment, Amp <sup>R</sup>                                                                                                                                                                                                                           | This work  |
| pPINKuvKpnISalI                 | pPINKuvKpnI with deleted 1834-bp <i>SalI</i> fragment, Amp <sup>R</sup>                                                                                                                                                                                                                           | This work  |
| pUC19-ORF4                      | pUC19 containing 918-bp <i>XbaI</i> – <i>BamHI</i> fragment with ORF4 sequence from pPINKuv plasmid, Amp <sup>R</sup>                                                                                                                                                                             | This work  |
| pUC19-RSFP                      | Encoding recombinant form of RSFP protein without His-tag domain, cloning vector                                                                                                                                                                                                                  | This work  |
| pUC19-His-tag-RSFP              | Encoding recombinant form of RSFP with His-tag placed at the C-terminal of the protein, cloning vector                                                                                                                                                                                            | This work  |
| pUC19-RSFP-His-tag              | Encoding recombinant form of RSFP with His-tag placed at the N-terminal of the protein, cloning vector                                                                                                                                                                                            | This work  |
| pET22b(+)                       | Expression vector, Amp <sup>R</sup>                                                                                                                                                                                                                                                               | Novagen    |
| pET22b-RSFP                     | Encoding recombinant form of RSFP protein without His-tag domain, expression vector                                                                                                                                                                                                               | This work  |
| pET22b-His-tag-RSFP             | Encoding recombinant form of RSFP with His-tag placed at the C-terminal of the protein, expression vector                                                                                                                                                                                         | This work  |
| pET22b-RSFP-His-tag             | Encoding recombinant form of RSFP with His-tag placed at the N-terminal of the protein, expression vector                                                                                                                                                                                         | This work  |

## Sampling

The analyzed soil sample was collected from Adelie penguin rookery (62°09'46"S, 58°27'42"W), which is located in the neighborhood of Henryk Arctowski Polish Antarctic Station at King George Island. The sampling depth was 0–5 cm. The soil sample was characterized by alkaline pH (8.9), hygroscopic water (~35%) and the amount (% of dry weight) of organic carbon (1.52 ± 0.42), nitrogen (0.81 ± 0.24), phosphorus (4.13 ± 1.5) and sulfur (0.42 ± 0.08).

Next, the soil sample was sieved to remove penguin dung debris and particulate matter > 2 mm and was kept without disturbance at 4 °C until analysis.

## General DNA manipulations

Restriction enzymes, T4 DNA ligase and alkaline phosphatase were purchased from Fermentas (Lithuania). Restriction enzymes and other DNA-modifying enzymes were used according to the manufacturer's recommendations. The reagents for PCR and various oligodeoxynucleotides were purchased from DNA-Gdansk II (Poland).

## Metagenomic library construction and screening for lipolytic activity

DNA from soil samples was extracted based on a method described previously (Zhou *et al.*, 1996) with some mod-

ifications. First, 25  $\mu$ L of lysozyme (10 mg mL<sup>−1</sup>, A&A Biotechnology, Poland) was added to the DNA extraction buffer [100 mM Tris-HCl (pH 8.0), 100 mM sodium EDTA (pH 8.0), 100 mM sodium phosphate (pH 8.0), 1.5 M NaCl, and 1% CTAB]. Second, 50  $\mu$ L of proteinase K (20 mg mL<sup>−1</sup>, A&A Biotechnology) was added to the sample incubated at 37 °C with horizontal shaking at 225 r.p.m. for 30 min. Finally, the extracted DNA was further purified using the Genomic Mini kit (A&A Biotechnology), followed by final purification with the Genomic AX Bacteria kit (A&A Biotechnology). The plasmid library of the purified DNA was constructed using the following procedures. DNA samples from Antarctic soil were used to construct the genomic DNA library following partial digestion with *Sau3AI*, optimized to maximize fragments in the 1–5-kbp size range. The fragments of 1–5 kbp resolved in an agarose gel were excised and concentrated. The *BamHI*-digested and phosphatase-treated pUC19 DNA was ligated using T4 DNA ligase (Epicentre) to the genomic DNA library digested with *Sau3AI*, and *Escherichia coli* TOP10F' (Invitrogen) were transformed with the ligation products. The lipase activities of the transformants were tested on Luria–Bertani (LB) agar containing 100  $\mu$ g mL<sup>−1</sup> of ampicillin, 0.1 mM isopropyl- $\beta$ -D-thiogalactopyranoside (IPTG), 2% (v/v) olive oil and 0.001% (w/v) rhodamine B (the fluorescent dye). This LB agar was designed as an LB-lipRB medium. Colonies were incubated for 1 day at 37 °C, followed by incubation for 2

days at 25 °C. Orange fluorescent halos around lipase-positive *E. coli* strains could be seen when these plates were exposed to a UV light of 312 nm (Kouker & Jaeger, 1987). Ampicillin, IPTG and rhodamine B were purchased from Sigma-Aldrich.

### Analysis of the pink fluorescent *E. coli* clone

The *E. coli* clone showing pink fluorescence was inoculated into a 250-mL flask containing 50 mL of LB medium (100 µg mL<sup>-1</sup> ampicillin). After overnight incubation at 37 °C, the cells were harvested by centrifugation at 5000 g for 15 min and washed twice with sterile distilled water. Next, the plasmid DNA was isolated using the Plasmid Mini isolation kit (A&A Biotechnology), retransformed into *E. coli* TOP10F' and the new clones were examined on the LB-lipRB medium for lipase activity. The plasmid DNA from one of the positive clones (pink fluorescence at UV light 312 nm) was isolated as described above and designated as pPINK-UV. Next, a few samples with plasmid pPINK-UV DNA were digested with selected restriction enzymes to create restriction maps of the examined plasmid. The nucleotide sequence of the DNA insert from the pPINK-UV plasmid was determined using an ABI 3730 xl/ABI 3700 sequencing instrument (Agowa DE, Germany). The ORFs were detected using the ORF FINDER (<http://www.ncbi.nlm.nih.gov/gorf/gorf.html>) provided by the National Center for Biotechnology Information (NCBI). The predicted function of ORFs was annotated using BLASTX search against the NCBI nonredundant protein database (Altschul *et al.*, 1997).

### Identification and isolation of the *rsfp* gene

The identification of the *rsfp* gene (ORF4 from pPINKuv plasmid) scheme is presented in Fig. 1. The putative *rsfp* gene was amplified from the pink fluorescent-positive clone (pPINKuv) using F<sub>19</sub> and R<sub>19</sub> primers (Table 2). The amplified DNA was digested with BamHI and XbaI enzymes and then ligated into BamHI and XbaI double-digested pUC19 (Fermentas). Finally, *E. coli* TOP10F' cells were transformed with the pUC19-ORF4 construct. The transformed cells were grown at 37 °C for 24 h on LB-lipRB medium and exposed to a UV light of 312 nm. Finally, the pUC19-ORF4 plasmid DNA obtained from one of the positive clones (pink fluorescence at UV light of 312 nm) was isolated and sequenced using ABI 3730 xl/ABI 3700 sequencing technology (Agowa DE).

### Characterization of the UV fluorescent recombinant strain of *E. coli* TOP10F'/pUC19-ORF4

The fluorescence of the recombinant *E. coli* TOP10F'/pUC19-ORF4 strain was examined: (1) during growth at 18, 25, 30 and 37 °C on LB-lipRB medium; (2) during

growth at 18, 25, 30 and 37 °C on LB-lipRB medium without 2% (v/v) olive oil; (3) during growth at 37 °C on LB agar containing 100 µg mL<sup>-1</sup> of ampicillin, 0.001% (w/v) rhodamine B with or without 0.1 mM IPTG; and (4) during growth at 37 °C on LB agar containing 100 µg mL<sup>-1</sup> of ampicillin, 0.1 mM IPTG and 2% (v/v) olive oil without 0.001% (w/v) rhodamine B. After incubation, the Petri dishes with visible *E. coli* colonies were exposed to a UV light of 312 nm for fluorescence examination. These experiments were carried out simultaneously with the *E. coli* TOP10F'/pUC19 and the *E. coli* TOP10F'/pPINKuv strains used as a negative and positive fluorescence controls, respectively. All experiments were triplicated independently.

### Characterization of UV fluorescent recombinant strains of *E. coli* transformed with pUC19-ORF4 plasmid DNA

The fluorescence of selected *E. coli* strains (Table 1) transformed with pUC19-ORF4 plasmid DNA was examined during growth at 37 °C for 24–48 h on LB-lipRB medium. After incubation, the Petri dishes with visible *E. coli* colonies were exposed to a UV light of 312 nm for fluorescence examination. These experiments were carried out simultaneously with the *E. coli* TOP10F'/pUC19 and the *E. coli* TOP10F'/pPINKuv strains used as negative and positive fluorescence controls, respectively. All experiments were triplicated independently.

### Expression and purification of recombinant RSFP protein in *E. coli*

For expression of RSFP, His-tag-RSFP and RSFP-His-tag proteins, the *rsfp* gene was amplified by PCR using appropriate primers (Table 2). The amplified DNA fragments were digested with XhoI enzyme, and then inserted into the pUC19 vector. The resulting recombinant plasmids were designed as pUC19-his-tag-RSFP, pUC19-RSFP-his-tag and pUC19-RSFP. The correctness of the constructed plasmids was confirmed by DNA sequencing using ABI 3730 XL sequencing technology (Genomed, Poland). Next, the expression plasmids were constructed in a three-step procedure. Firstly, the pUC19-his-tag-RSFP, pUC19-RSFP-his-tag and pUC19-RSFP were digested with NdeI and XhoI enzymes. Secondly, the resulted DNA fragments were separated on a 1.0% agarose gel, extracted from the gel using Gel-out (A&A Biotechnology) and then inserted into the NdeI and XhoI sites of pET-22b(+) expression vector. The resulting expression plasmids, named pET22b-RSFP, pET22b-His-tag-RSFP and pET22b-RSFP-His-tag (Table 1), were used for production of the wild type and N-His-tagged RSFP proteins, respectively.

Overproduction of the RSFP proteins was performed in the BL21(DE3)pLysS (Novagen) cells carrying the

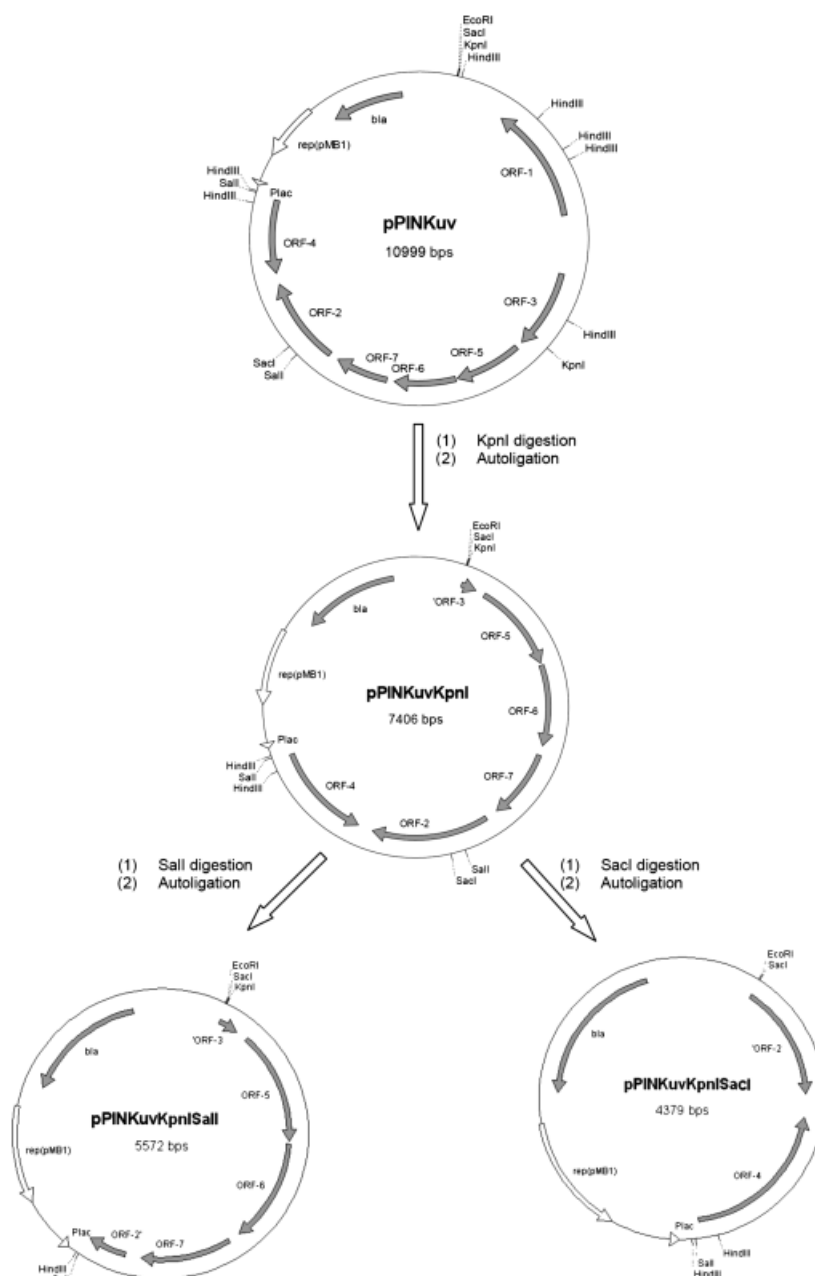

Fig. 1. Identification scheme of the *rsfp* gene.

pET22b-RSFP, pET22b-His-tag-RSFP or pET22b-RSFP-His-tag plasmids. Cells were grown at 30 °C in LB medium (1% peptone K, 0.5% yeast extract, and 1% NaCl) containing 20 µg mL<sup>-1</sup> of chloramphenicol and 100 µg mL<sup>-1</sup> of ampicillin. At OD<sub>600 nm</sub> = 0.5, IPTG was added to a final concentration of 1 mM and cultivation was continued for 5 h. Subsequently, cultures were centrifuged (5000 g, 15 min, 4 °C) and pellets were resuspended in buffer A (50 mM Tris-HCl, pH 8.0). Samples were sonicated, and the cell debris and inclusion bodies were collected by centrifugation at

10 000 g, for 20 min, at 4 °C. The precipitate containing inclusion bodies was solubilized and RSFP protein was refolded according to the previously described procedure (Cieśliński *et al.*, 2007).

His-tag RSFP proteins were purified using His-Bind Resin (Novagen) with Ni<sup>2+</sup> ions according to the standard procedure. The purity of the proteins was examined by sodium dodecyl sulfate polyacrylamide gel electrophoresis as described by Laemmli (1970). The proteins' concentrations were measured using the method of Bradford (1976).

**Table 2.** Sequences of PCR primers used for PCR products amplification in this study

| Primer pair | Primer name and sequence (5'–3')                                    | Source    |
|-------------|---------------------------------------------------------------------|-----------|
| A           | F_19: GACTCTAGAGGATCATTGGAGCCCAATATG                                | This work |
|             | R_19: AATGGATCCTACGGAAGTAATGCTGCAAGT                                | This work |
| B           | rsfp-His6-for*: AAACCTCGAGCATATGCACCATCATCATCATGACTTCAACCGCAG       | This work |
|             | rsfp-rev: TTTCTCGAGCTACGGAAGTAATGCTGCAAGTCTTGTCT                    | This work |
| C           | rsfp-for: AAACCTCGAGCATATGACTTCAACCGCAGTAGAAATTACGGT                | This work |
|             | rsfp-His6-rev*: TTTCTCGAGCTAGTGATGATGATGATGGTGCAGGAAGTAATGCTGCAAGTC | This work |

\*The DNA sequence (italic) of rsfp-His6-for and rsfp-His6-rev primers encoding His-tag domain.

**Table 3.** Sequence analysis of the ORFs encoded in metagenomic insert of pPINKuv

| No. of ORF | Length (amino acid) | Putative function (most similar homologue) | Putative source organism            | Accession number | % Identity/similarity | E-value            |
|------------|---------------------|--------------------------------------------|-------------------------------------|------------------|-----------------------|--------------------|
| 1          | 477                 | Hypothetical protein MDG893_17282          | <i>Marinobacter algicola</i> DG893  | ZP_01895580      | 55/66                 | 2e <sup>-139</sup> |
| 2          | 351                 | Methyltransferase                          | <i>Psychrobacter arcticus</i> 273-4 | YP_264441        | 95/97                 | 0                  |
| 3          | 322                 | Hypothetical protein Psyc_1160             | <i>Psychrobacter arcticus</i> 273-4 | YP_264445        | 97/98                 | 0                  |
| 4          | 297                 | Methylthioadenosine phosphorylase          | <i>Psychrobacter arcticus</i> 273-4 | YP_264440        | 93/96                 | 2e <sup>-163</sup> |
| 5          | 269                 | Hypothetical protein Psyc_1159             | <i>Psychrobacter arcticus</i> 273-4 | YP_264444        | 90/94                 | 4e <sup>-143</sup> |
| 6          | 246                 | Glycosyl transferase                       | <i>Psychrobacter arcticus</i> 273-4 | YP_264443        | 82/91                 | 2e <sup>-117</sup> |
| 7          | 212                 | Hypothetical protein Psyc_1157             | <i>Psychrobacter arcticus</i> 273-4 | YP_264442        | 86/92                 | 2e <sup>-98</sup>  |

### The pink fluorescence assay

Ninety microliters of cell debris of *E. coli* BL21(DE3)pLysS/pET-RSFP after insoluble bodies separation (or 90 µL insoluble bodies' solution after refolding and dialysis to buffer A) were mixed with 10 µL of rhodamine B solution in buffer A (0.1 µg mL<sup>-1</sup>). Simultaneously, 90 µL cell debris of *E. coli* BL21(DE3)pLysS/pET22b(+) (negative control) and 90 µL of buffer A were mixed with 10 µL rhodamine B solution in buffer A (0.1 µg mL<sup>-1</sup>) (blank sample). Afterwards, the fluorescence of the samples was observed under UV (312 nm) and documented by photographs using a Versadoc model 1000 (Biometra). The same procedure was used for purified His-tag-RSFP and RSFP-His-tag proteins.

### Nucleotide sequence accession number

The sequence of the *rsfp* gene was deposited in the GenBank database with accession number GQ202582.

## Results

### Construction and screening of a metagenomic library

A metagenomic library consisting of ~85 000 clones was constructed using DNA isolated from a soil sample collected from Adelie penguin rookery, which is located in the neighborhood of Henryk Arctowski Polish Antarctic Station at King George Island. To screen for lipase-producing clones, the pUC19-derived clones were plated on an LB-

lipRB medium. Several clones with lipolytic activity were detected. Unexpectedly, one of the obtained clones showed unusually strong pink fluorescence under UV illuminations without the expected orange fluorescent halo around it. Further examination revealed that this clone showed no lipolytic activity. This unusual clone was designated as pPINKuv.

### Molecular analysis of pPINKuv

The insert of the recombinant plasmid recovered from *E. coli*/pPINKuv strain was sequenced. The nucleotide sequence analysis revealed the presence of seven ORFs longer than 100 codons. Three ORFs among those exhibited similarities to genes annotated with predicted functions (Table 3). Moreover, the results from the Table 3 showed that the metagenomic DNA insert is probably derived from genomic DNA of cold-adapted bacteria belonging to the *Psychrobacter* genus.

In order to identify the gene(s) responsible for the pink fluorescence, the metagenomic insert was partially digested with selected restriction endonucleases and the restriction fragments were subsequently cloned into pUC19 (Fig. 1). *Escherichia coli* TOP10F' were transformed with the resulting constructs. The recombinant *E. coli* strains were screened for pink fluorescence again on LB-lipRB medium. This strategy was successful for two constructed plasmids designated as pPINKuvKpnI and pPINKuvKpnISacI. Two corresponding *E. coli* strains, *E. coli*/pPINKuvKpnI and *E. coli*/pPINKuvKpnISacI, were indistinguishable from the original

clone with respect to the observed pink fluorescence. In contrast to these results, the colonies of the *E. coli*/pPIN-KuvKpnISall strain growing on the LB-lipRB medium did not show any pink fluorescence under UV illumination.

The positive pPINKuvKpnISacI clone with the smallest insert (1710 bp) contained the full sequence of the ORF4 and the partial sequence of the ORF2 from the pPINKuv clone (Fig. 1). Moreover, ORF4 was cloned in the orientation that allowed to express the ORF4 from the pLac promoter present in the pUC19 plasmid. We decided to clone the DNA fragment containing the ORF4 and its 25-bp upstream flanking region from the pPINKuv plasmid to the pUC19 vector. The metagenomic DNA fragment with the ORF4 sequence was amplified by PCR and inserted into pUC19 downstream of the pLac promoter. The 25-bp DNA sequence between the pLac promoter and the ATG starting codon of the ORF4 sequence was the same as in the metagenomic DNA. *Escherichia coli* TOP10F<sup>+</sup> were transformed with the resulting pUC19-ORF4 plasmid, and the *E. coli* TOP10F<sup>+</sup>/pUC19-ORF4 colonies showed pink fluorescence on LB-lipRB medium under UV illumination.

In the next stage of our study, *E. coli* TOP10F<sup>+</sup> were transformed with pUC19-ORF4, pPINKuv and pUC19 to screen for colony pink fluorescence after growth at 18, 25, 30 and 37 °C on LB-lipRB medium with or without supplementation of the olive oil. The *E. coli*/pPINKuv and the *E. coli*/pUC19-ORF4 colonies showed pink fluorescence after growth at 25, 30 and 37 °C. The colonies of the same

strains did not show any pink fluorescence when cultured at 18 °C. We did not observe distinguishable differences in the fluorescence of the *E. coli*/pPINKuv and the *E. coli*/pUC19-ORF4 colonies (Fig. 2). Moreover, the colonies of both the strains analyzed showed comparable pink fluorescence after growth on media with and without olive oil supplementation (Table 4).

The *E. coli*/pUC19-ORF4 and *E. coli*/pPINKuv colonies showed weaker intensities of fluorescence after growth on the LB agar plates supplemented with ampicillin and rhodamine B than on the LB agar plates supplemented with ampicillin, IPTG and rhodamine B. This result confirmed that IPTG induced the expression of the RSFP protein from the pLac promoter from both the pUC19-ORF4 and the pPINKuv plasmid in *E. coli*.

The colonies of *E. coli*/pUC19-ORF4, *E. coli*/pPINK-UV and *E. coli*/pUC19 did not show any pink fluorescence on the LB agar plates supplemented with ampicillin, IPTG and olive oil but without rhodamine B. The presence of rhodamine B in culture media was crucial for the pink fluorescence of the recombinant *E. coli*/pUC19-ORF4 colonies.

The following *E. coli* strains: LMG194, JM101, DH5 $\alpha$  and BL21(DE3)pLysS (Table 1) were transformed with pUC19-ORF4, pPINKuv or pUC19 plasmids, and examined for pink fluorescence. The examined strains transformed with pUC19-ORF4 or pPINKuv plasmids showed pink fluorescence under screening conditions.

**Fig. 2.** Fluorescence of the *Escherichia coli* TOP10F<sup>+</sup>/pPINKuv (a), *E. coli* TOP10F<sup>+</sup>/pUC19-ORF4 (b) and *E. coli* TOP10F<sup>+</sup>/pUC19 (c) colonies on the LB-lipRB plates without supplementation of olive oil under UV illumination (312 nm) after growth at 37 °C.

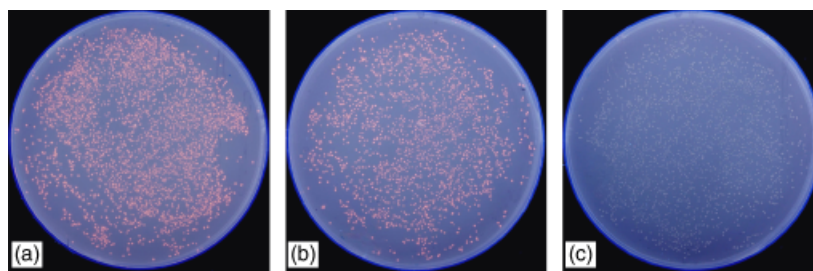

**Table 4.** The fluorescence of the *Escherichia coli* TOP10F<sup>+</sup>/pUC19, *E. coli* TOP10F<sup>+</sup>/pUC19-RSFP and *E. coli* TOP10F<sup>+</sup>/pPINKuv colonies after growth at different temperatures

| Strains                                        | Colonies fluorescence at UV 312 nm |       |       |       |                                   |       |       |       |
|------------------------------------------------|------------------------------------|-------|-------|-------|-----------------------------------|-------|-------|-------|
|                                                | LB-lipRB medium with olive oil     |       |       |       | LB-lipRB medium without olive oil |       |       |       |
|                                                | 18 °C                              | 25 °C | 30 °C | 37 °C | 18 °C                             | 25 °C | 30 °C | 37 °C |
| <i>E. coli</i> TOP10F <sup>+</sup> /pUC19      | —                                  | —     | —     | —     | —                                 | —     | —     | —*    |
| <i>E. coli</i> TOP10F <sup>+</sup> /pUC19-RSFP | —                                  | +     | +     | +     | —                                 | +     | +     | +     |
| <i>E. coli</i> TOP10F <sup>+</sup> /pPINKuv    | —                                  | +     | +     | +     | —                                 | +     | +     | +     |

+, presence of pink fluorescence; —, lack of pink fluorescence (background fluorescence).

\*The results presented in Fig. 2.

### Sequence analysis of the ORF4 product

The results reported above showed that the ORF4 product was responsible for the observed pink fluorescence. A nucleotide sequence of ORF4 encoded a protein with 93% identity to the methylthioadenosine phosphorylase of *Psychrobacter arcticus* 273-4 (GenBank accession no. AAZ19006). On this basis, we decided to name the ORF4 as an *rsfp* gene (rhodamine B, screening for lypolytic active clones, pink fluorescence of *E. coli* clones at UV light and methylthioadenosine phosphorylase (MTA phosphorylase).

### Expression and purification of recombinant forms of the RSFP protein

To characterize whether the *rsfp* gene product interacts with rhodamine B, we heterologously expressed the *rsfp* gene in *E. coli*. For this, we constructed three recombinant strains: *E. coli* BL21(DE3)pLysS/pET-RSFP, *E. coli* BL21(DE3)pLysS/pET-His-tag-RSFP and *E. coli* BL21(DE3)pLysS/pET-RSFP-His-tag that overexpressed recombinant RSFP proteins without modification of the amino acid sequence and with the polyhistidine-tag at the N- or the C-terminus of the protein, respectively. Unfortunately, in each case, most of the RSFP proteins were found to be insoluble (data not shown). Furthermore, the refolded RSFP protein and the His-tag-RSFP and RSFP-His-tag proteins before and after purification using metal-affinity chromatography did not show any pink fluorescence in the presence of rhodamine B (the pink fluorescence assay). In contrast to this, the cell debris of the tested strains revealed strong fluorescence in the presence of rhodamine B (Fig. 3). However, the fluorescence disappeared after approximately 1 h of incubation of cell debris at 37 °C or 16 h at 4 °C. The addition of

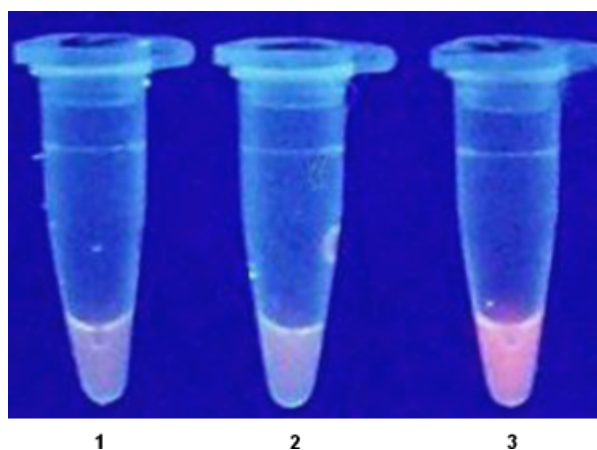

**Fig. 3.** The pink fluorescence assay: tube 1, the rhodamine B solution in buffer A (blank); tube 2, the cell debris of *Escherichia coli* BL21(DE3)-pLysS/pET22b (negative control); and tube 3, the cell debris of *E. coli* BL21(DE3)pLysS/pET22b-RSFP (analyzed sample).

dithiothreitol (1 mM) to cell debris prolonged the time of observed pink fluorescence for analyzed samples.

### Discussion

This is the first report describing the pink fluorescence phenomenon of the recombinant *E. coli* cells expressing the MTA phosphorylase gene growing on media containing rhodamine B.

Rhodamine B is a fluorescent dye used in a variety of biological studies, for example, as a marker and tracer in animal and insect studies (Lindsey, 1983; Blanco *et al.*, 2006), as a mitochondrial probe for measurement and monitoring of mitochondrial membrane potential (Reungpatthanaphong *et al.*, 2003), as a marker in multi-drug-resistant protein activity determination (Smital & Kurelec, 1998), as an extremely specific stain for cornification (Liisberg, 1968) and as a fluorescent dye in the complex with free fatty acids in a plate assay for bacterial lipases (Kouker & Jaeger, 1987).

The *rsfp* gene product shows strong similarity to the methylthioadenosine phosphorylase from *P. arcticus* 273-4 (Table 3). The gene coding for MTA phosphorylase has been identified in many organisms, in all three kingdoms: Archaea, Bacteria and Eukarya. MTA phosphorylase is responsible for the first step in the methionine salvage pathway after the transfer of the amino acid moiety from S-adenosylmethionine (Sekowska *et al.*, 2004). A human MTA phosphorylase is known as a ubiquitously expressed house-keeping gene in normal human tissues and cells. This enzyme has also been found to be deficient in a variety of human cancers (Behrmann *et al.*, 2003; Berasain *et al.*, 2004; Subhi *et al.*, 2004; Hellerbrand *et al.*, 2006; Marcé *et al.*, 2006). However, to our knowledge, there is no information about the participation of MTA phosphorylases in rhodamine-dependent fluorescence of the bacterial cells under UV illumination.

We found that the expression of the methylthioadenosine phosphorylase encoded by the ORF4 (*rsfp* gene) of the pPINKuv plasmid in *E. coli* cells and the presence of rhodamine B in the screening media were crucial for the observed pink fluorescence phenomena. The differences in the genetic background of the analyzed *E. coli* strains and a copy number of recombinant plasmid with the *rsfp* gene have no influence on the molecular mechanism responsible for the pink fluorescence observed. We constructed recombinant *E. coli* clones harboring low copy number recombinant pACYC184-*rsfp* plasmids that show the same intensity of pink fluorescence (data not shown).

The constructed *E. coli* strains showed pink fluorescence at 25, 30 and 37 °C, but not at 18 °C. At this stage of research, we are unable to explain the lack of fluorescence of the colonies grown at 18 °C without the elucidation of the



roles of the MTA phosphorylase and rhodamine B in the pink fluorescence phenomena. To do this, we obtained recombinant RSFP proteins, partially purified from insoluble bodies. However, these proteins did not show any fluorescence in the pink fluorescence assay. In contrast to this, the cell debris of recombinant *E. coli* strains showed fluorescence. These results suggest that besides the RSFP protein and rhodamine B, an additional factor is required for pink fluorescence phenomena. At the present stage of our research, we do not have enough data to explain the mechanism of the observed fluorescence phenomenon. Further studies will be necessary to clarify the relationship between the presence of rhodamine B in media and the MTA phosphorylase identified in this mechanism. The results presented in this paper encourage us to test the *rsfp* gene as a new marker gene (*in vivo*), for example, as a marker gene for a new set of promoter-trapping vectors for psychrotrophic or mesophilic bacteria.

## Acknowledgement

This work was supported by the Polish State Committee for Scientific Research Grant 2 P04B 018 30.

## References

- Altschul SF, Madden TL, Schaffer AA, Zhang J, Zhang Z, Miller W & Lipman DJ (1997) Gapped BLAST and PSI-BLAST: a new generation of protein database search programs. *Nucleic Acids Res* **25**: 3389–3402.
- Amann RI, Ludwig W & Schleifer KH (1995) Phylogenetic identification and *in situ* detection of individual microbial cells without cultivation. *Microbiol Rev* **59**: 143–169.
- Behrmann I, Wallner S, Komyod W, Heinrich PC, Schuierer M, Buettner R & Bosserhoff AK (2003) Characterization of methylthioadenosine phosphorylase (MTAP) expression in malignant melanoma. *Am J Pathol* **163**: 683–690.
- Berasain C, Hevia H, Fernández-Irigoyen J, Larrea E, Caballería J, Mato JM, Prieto J, Corrales FJ, García-Trevijano ER & Avila MA (2004) Methylthioadenosine phosphorylase gene expression is impaired in human liver cirrhosis and hepatocarcinoma. *Biochim Biophys Acta* **1690**: 276–284.
- Blanco CA, Perera O, Ray JD, Taliercio E & Iiams L III (2006) Incorporation of rhodamine B into male tobacco budworm moths *Heliothis virescens* to use as a marker for mating studies. *J Insect Sci* **5**: 1–10.
- Bradford MM (1976) A rapid and sensitive method for the quantitation of microgram quantities of protein utilizing the principle of protein-dye binding. *Anal Biochem* **72**: 248–254.
- Cieśliński H, Białkowska AM, Długołęcka A, Daroch M, Tkaczuk KL, Kalinowska H, Kur J & Turkiewicz M (2007) A cold-adapted esterase from psychrotrophic *Pseudoalteromonas* sp. strain 643A. *Arch Microbiol* **188**: 27–36.
- Daniel R (2004) The soil metagenome – a rich resource for the discovery of novel natural products. *Curr Opin Biotech* **15**: 199–204.
- DeSantis G, Zhu Z, Greenberg WA, Wong K, Chaplin J, Hanson SR, Farwell B & Nicholson LW (2002) An enzyme library approach to biocatalysis: development of nitrilases for enantioselective production of carboxylic acid derivatives. *J Am Chem Soc* **7**: 9024–9025.
- Gillespie DE, Brady SF, Bettermann AD, Cianciotto NP, Liles MR, Rondon MR, Clardy J, Goodman RM & Handelsman J (2002) Isolation of antibiotics turbomycin A and B from a metagenomic library of soil microbial DNA. *Appl Environ Microb* **68**: 4301–4306.
- Gupta R, Beg QK & Lorenz P (2002) Bacterial alkaline proteases: molecular approaches and industrial applications. *Appl Microbiol Biot* **59**: 15–32.
- Hardeman F & Sjoling S (2007) Metagenomic approach for the isolation of a novel low-temperature-active lipase from uncultured bacteria of marine sediment. *FEMS Microbiol Ecol* **59**: 524–534.
- Hellerbrand C, Mühlbauer M, Wallner S, Schuierer M, Behrmann I, Bataille F, Weiss T, Schölmerich J & Bosserhoff AK (2006) Promoter-hypermethylation is causing functional relevant downregulation of methylthioadenosine phosphorylase (MTAP) expression in hepatocellular carcinoma. *Carcinogenesis* **27**: 64–72.
- Hu Y, Zhang G, Li A, Chen J & Ma L (2008) Cloning and enzymatic characterization of a xylanase gene from a soil-derived metagenomic library with an efficient approach. *Appl Microbiol Biot* **80**: 823–830.
- Jeon JH, Kim JT, Kang SG, Lee JH & Kim SJ (2009) Characterization and its potential application of two esterases derived from the Arctic sediment metagenome. *Mar Biotechnol* **11**: 307–316.
- Kim SJ, Lee CM, Han BR, Kim MY, Yeo YS, Yoon SH, Koo BS & Jun HK (2008) Characterization of a gene encoding cellulase from uncultured soil bacteria. *FEMS Microbiol Lett* **282**: 44–51.
- Kim YJ, Choi GS, Kim SB, Yoon GS, Kim YS & Ryu YW (2006) Screening and characterization of a novel esterase from a metagenomic library. *Protein Expres Purif* **45**: 315–323.
- Kouker G & Jaeger KE (1987) Specific and sensitive plate assay for bacterial lipases. *Appl Environ Microb* **53**: 211–213.
- Laemmli UK (1970) Cleavage of structural proteins during the assembly of the head of bacteriophage T4. *Nature* **227**: 680–685.
- Liisberg MF (1968) Rhodamine B as an extremely specific stain for cornification. *Acta Anat* **69**: 52–57.
- Lindsey GD (1983) Rhodamine B: a systemic fluorescent marker for studying mountain beavers (*Aplodontia rufa*) and other animals. *Northwest Sci* **57**: 16–21.
- Marcé S, Balagué O, Colomo L *et al.* (2006) Lack of methylthioadenosine phosphorylase expression in mantle cell lymphoma is associated with shorter survival: implications for a potential targeted therapy. *Clin Cancer Res* **12**: 3754–3761.



- Park HJ, Jeon JH, Kang SG, Lee JH, Lee SA & Kim HK (2007) Functional expression and refolding of new alkaline esterase, EM2L8 from deep-sea sediment metagenome. *Protein Express Purif* **52**: 340–347.
- Rappe MS & Giovannoni SJ (2003) The uncultured microbial majority. *Annu Rev Microbiol* **57**: 369–394.
- Reungpatthanaphong P, Dechsupa S, Meesungnoen J, Loetchutinat C & Mankhetkorn S (2003) Rhodamine B as a mitochondrial probe for measurement and monitoring of mitochondrial membrane potential in drug-sensitive and -resistant cells. *J Biochem Bioph Meth* **57**: 1–16.
- Schloss PD & Handelsman J (2003) Biotechnological prospects from metagenomics. *Curr Opin Biotech* **14**: 303–310.
- Sekowska A, Dénervaud V, Ashida H, Michoud K, Haas D, Yokota A & Danchin A (2004) Bacterial variations on the methionine salvage pathway. *BMC Microbiol* **4**: 9.
- Smital T & Kurelec B (1998) The activity of multixenobiotic resistance mechanism determined by rhodamine B-efflux method as a biomarker of exposure. *Mar Environ Res* **46**: 443–447.
- Streit WR, Daniel R & Jaeger KE (2004) Prospecting for biocatalysts and drugs in the genomes of non-cultured microorganisms. *Curr Opin Biotech* **15**: 285–290.
- Subhi AL, Tang B, Balsara BR, Altomare DA, Testa JR, Cooper HS, Hoffman JP, Meropol NJ & Kruger WD (2004) Loss of methylthioadenosine phosphorylase and elevated ornithine decarboxylase is common in pancreatic cancer. *Clin Cancer Res* **10**: 7290–7296.
- Wei P, Bai L, Song W & Hao G (2008) Characterization of two soil metagenome-derived lipases with high specificity for *p*-nitrophenyl palmitate. *Arch Microbiol* **191**: 233–240.
- Yun J, Kang S, Park S, Yoon H, Kim MJ, Heu S & Ryu S (2004) Characterization of a novel amylolytic enzyme encoded by a gene from a soil-derived metagenomic library. *Appl Environ Microb* **70**: 7229–7235.
- Zhou J, Bruns MA & Tiedje JM (1996) DNA recovery from soils of diverse composition. *Appl Environ Microb* **62**: 316–322.
